# Supplementary material for: Multiepitope supramolecular peptide nanofibers eliciting coordinated humoral and cellular antitumor immune responses
Source: PubMed Central journal article supplement — Sci Adv. 2022 Jul 20;8(29):eabm7833. doi: 10.1126/sciadv.abm7833 (PMC9299545; doi:10.1126/sciadv.abm7833), 2022-07-20
Supplement: sciadv.abm7833_sm.pdf [file sciadv.abm7833_sm.pdf]

Supplementary Materials for  
**Multiepitope supramolecular peptide nanofibers eliciting coordinated  
humoral and cellular antitumor immune responses**

Yaoying Wu *et al.*

Corresponding author: Joel H. Collier, joel.collier@duke.edu

*Sci. Adv.* **8**, eabm7833 (2022)  
DOI: 10.1126/sciadv.abm7833

**This PDF file includes:**

Table S1  
Figs. S1 to S12

**Table S1 Peptides used in this paper. All peptides were purified by HPLC, and the masses were confirmed by MALDI**

|                                                                                                                 |                |
|-----------------------------------------------------------------------------------------------------------------|----------------|
| <b>PEPvIII-Coil29</b><br>NH <sub>2</sub> -LEEKKGNYVVDH SGSG QARILEADAEILRAYARILEAHAEILRAQ-NH <sub>2</sub> *     | MW= 5105 g/mol |
| <b>Trp2-Coil29</b><br>NH <sub>2</sub> -SVYDFFVWL AAYGG QARILEADAEILRAYARILEAHAEILRAQ-NH <sub>2</sub> *          | MW= 4880 g/mol |
| <b>Td-Coil29</b><br>NH <sub>2</sub> -FNNFTVSFWLRVPKVSASHLE SGSG QARILEADAEILRAYARILEAHAEILRAQ-NH <sub>2</sub> * | MW= 6053 g/mol |
| <b>Coil29</b><br>Ac-QARILEADAEILRAYARILEAHAEILRAQ-NH <sub>2</sub> *                                             | MW= 3345 g/mol |
| <b>PEPvIII</b><br>NH <sub>2</sub> -LEEKKGNYVVDH-NH <sub>2</sub> *                                               | MW= 1531 g/mol |
| <b>Trp2</b><br>NH <sub>2</sub> -SVYDFFVWL-NH <sub>2</sub> *                                                     | MW= 1174 g/mol |
| <b>Td</b><br>NH <sub>2</sub> -FNNFTVSFWLRVPKVSASHLE-NH <sub>2</sub> *                                           | MW= 2478 g/mol |
| <b>Biotin-PEPvIII</b><br>Biotin-LEEKKGNYVVDH-NH <sub>2</sub> *                                                  | MW= 1757 g/mol |

\*N-terminal NH<sub>2</sub> indicates amidation

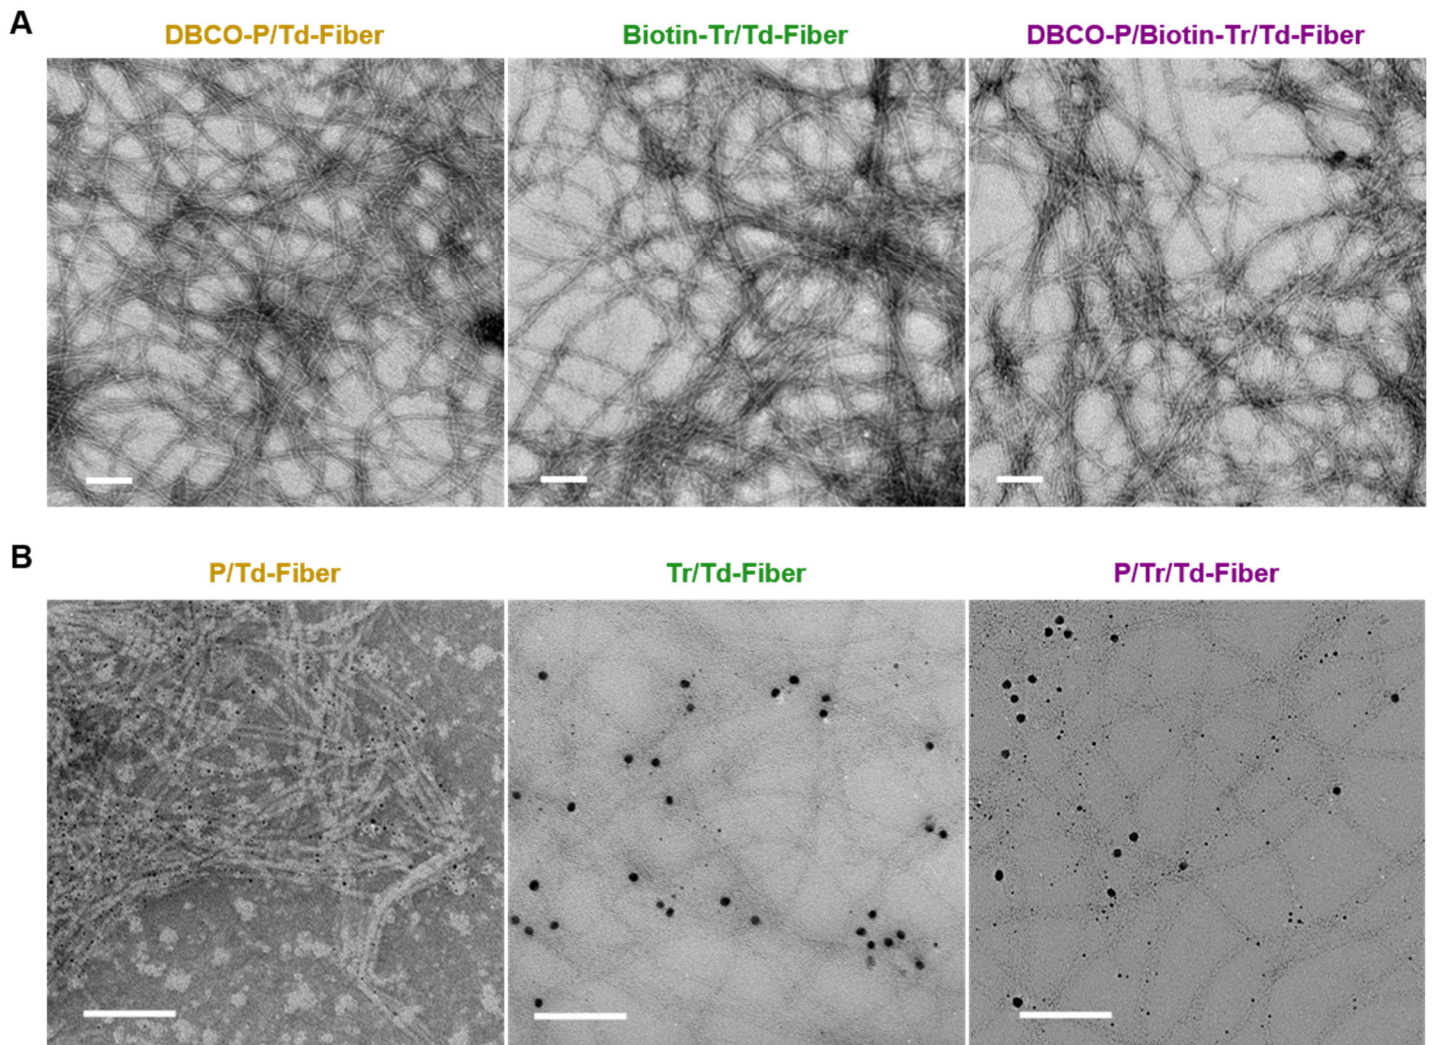

**Figure S1. (A)** Labelling handle modified peptides showed self-assembled morphology consistent to unmodified Coil29 nanofibers. **(B)** Gold nanoparticle labeling confirmed co-assembly between PEPvIII-Coil29 and Trp2-Coil29 peptides (five-nanometer particles label PEPvIII epitopes and ten-nanometer particles label Trp2 epitopes; scale bar = 100 nm)

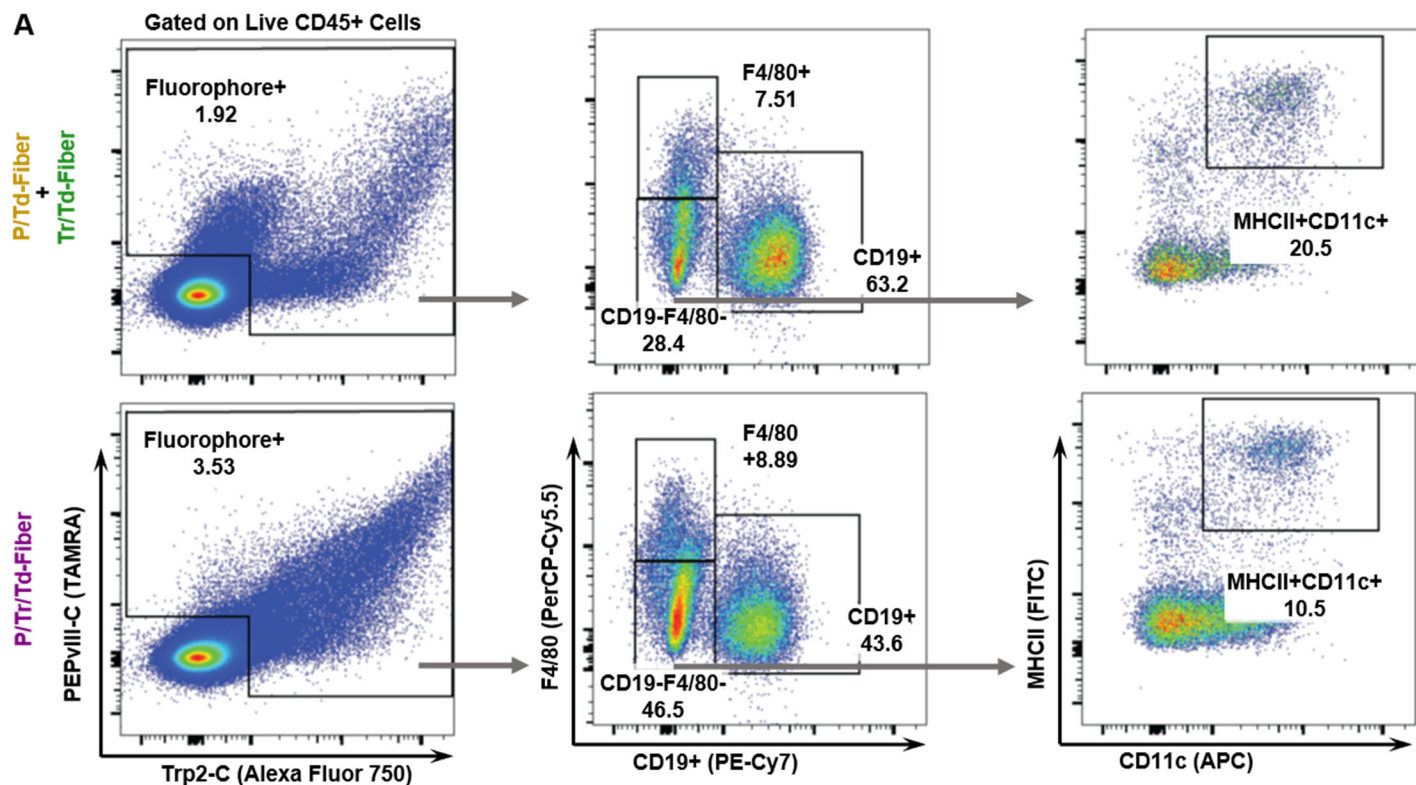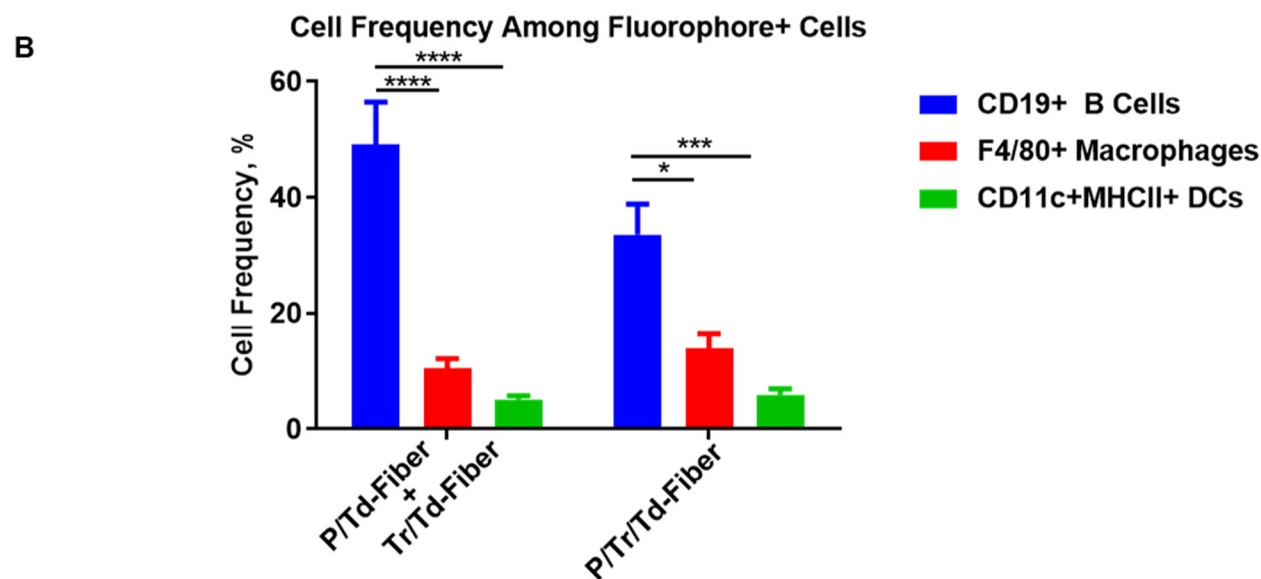

**Figure S2** The majority of fluorophore-labeled nanofibers were taken up by CD19+ B cells, with F4/80+ macrophages and CD11c+MHCII+ dendritic cells internalizing smaller proportions of the materials, 4 h after IP administration. **(A)** Representative flow histogram **(B)** The frequencies of each cell types among fluorophore+ CD45+ cells (\*  $p < 0.05$ , \*\*  $p < 0.01$ , \*\*\*  $p < 0.001$ , \*\*\*\*  $p < 0.0001$  by multiple comparison calculated using two-way ANOVA with Tukey test.  $N=3$ ).

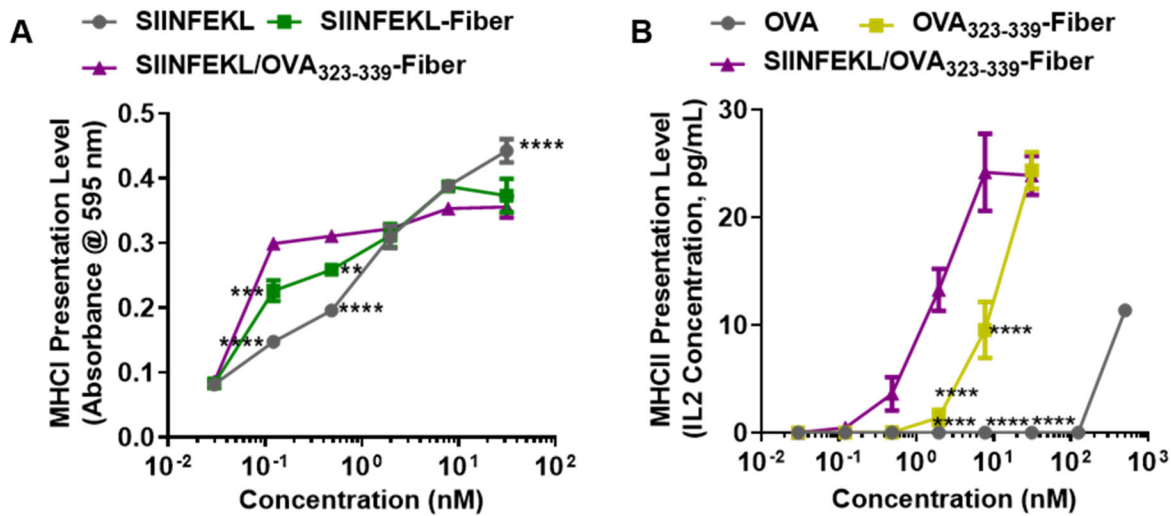

**Figure S3. Both CD4<sup>+</sup> and CD8<sup>+</sup> T cell epitopes were efficiently presented in vitro when delivered by co-assembled nanofibers.** (A) BMDCs were incubated with either SIINFEKL peptides or assembled nanofibers from indicated groups for 4 hours, followed by incubation with B3Z hybridoma reporter cells for 12 hours. Co-assembled nanofibers were found to efficiently present CD8<sup>+</sup> T cell epitopes (\*\*\*\*  $p < 0.0001$ , \*\*\*  $p < 0.001$ , \*\*  $p < 0.01$ , when compared to SIINFEKL/OVA<sub>323-339</sub>-fiber group by multiple comparison using two-way ANOVA with Dunnett test; N=3) (B) BMDC were incubated with either OVA<sub>323-339</sub> peptides or assembled nanofibers from indicated groups, followed by DOBW hybridoma reporter cells. IL-2 ELISA assays were carried out to determine the level of OVA<sub>323-339</sub>/MHCII presentation for different treatment conditions. Co-assembled nanofibers were found to efficiently present CD4<sup>+</sup> T cell epitopes (\*\*\*\*  $p < 0.0001$  when compared to co-assembled SIINFEKL/OVA<sub>323-339</sub>-fiber group, as determined by multiple comparison using two-way ANOVA with Dunnett test; N=3).

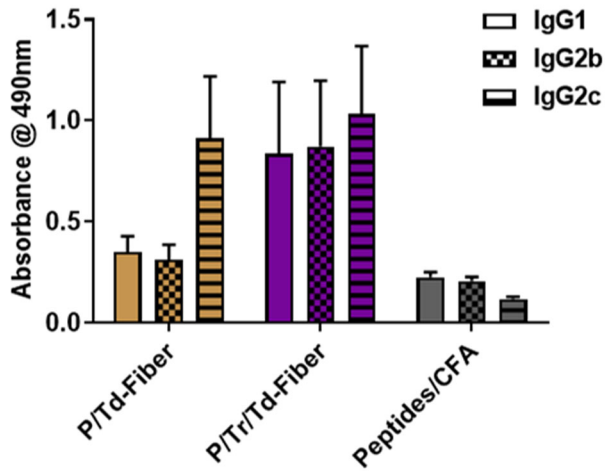

**Figure S4. CpG-adjuvanted nanofibers elicited Th1-biased IgG responses.** Sera were collected from mice in Fig 3A on week 5 and diluted 500-fold for isotype ELISA.

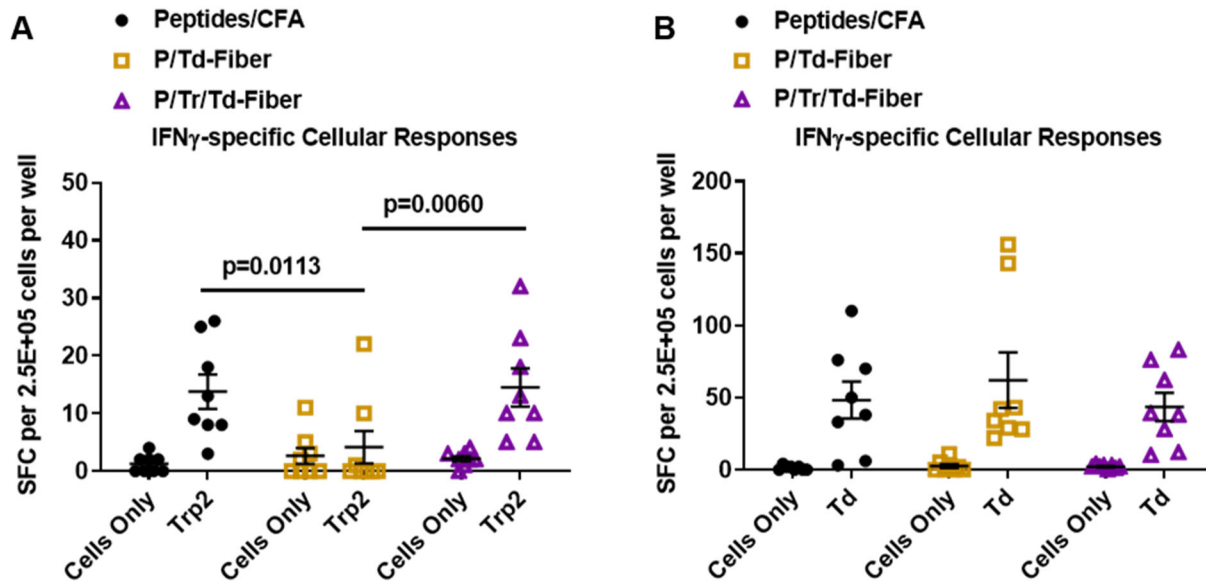

**Figure S5. Co-assembled P/Td-fibers elicited strong cellular responses against Td CD4<sup>+</sup> T cell epitopes, but generated low background Trp2-specific responses.** Splenocytes from immunized mice in Fig 2A were harvested 7 days after final immunizations, and were examined for cellular responses against Trp2 (A) and Td (B), using IFN-specific ELISPOT assay. (A) p-values calculated by multiple comparison using two-way ANOVA with Tukey test. N=8 (B) No statistical differences were found between groups for either stimulation condition by multiple comparison using two-way ANOVA with Tukey test. N=8.

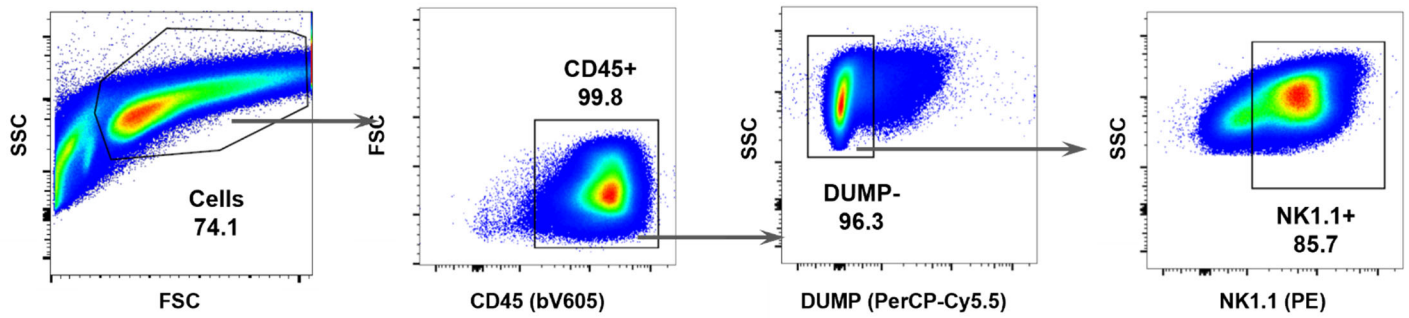

**Figure S6.** NK1.1+ cells were expanded and harvested for ADCC assays after 12-day culture of splenocytes in the presence of IL-2 at 1000 U/mL.

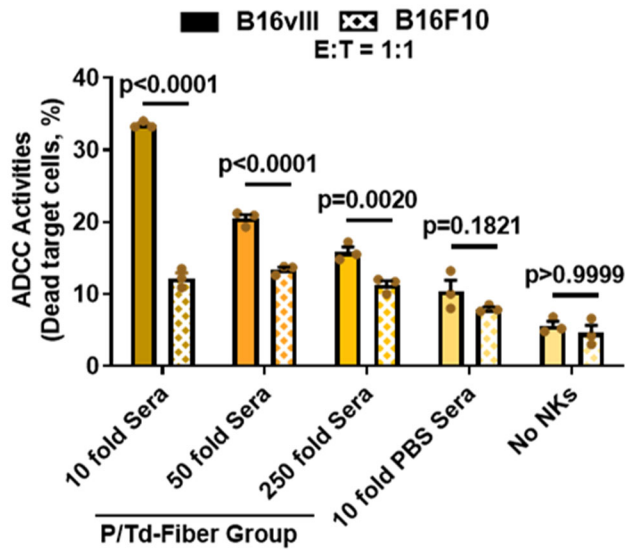

**Figure S7.** Sera from mice immunized with P/Td-fibers mediated ADCC activity specifically against B16 cells with EGFRvIII receptors. CFSE-labelled B16vIII or B16F10 cells were incubated with mouse NK cells with an E:T ratio of 1:1 in the presence of mouse sera after serial dilutions. The viability of B16vIII were assessed after 7 hour incubation, and the percentage of dead cells is defined as ADCC activity. The p values were calculated between different cell types within each treatment group by multiple comparison using two-way ANOVA with Bonferroni test. N=3

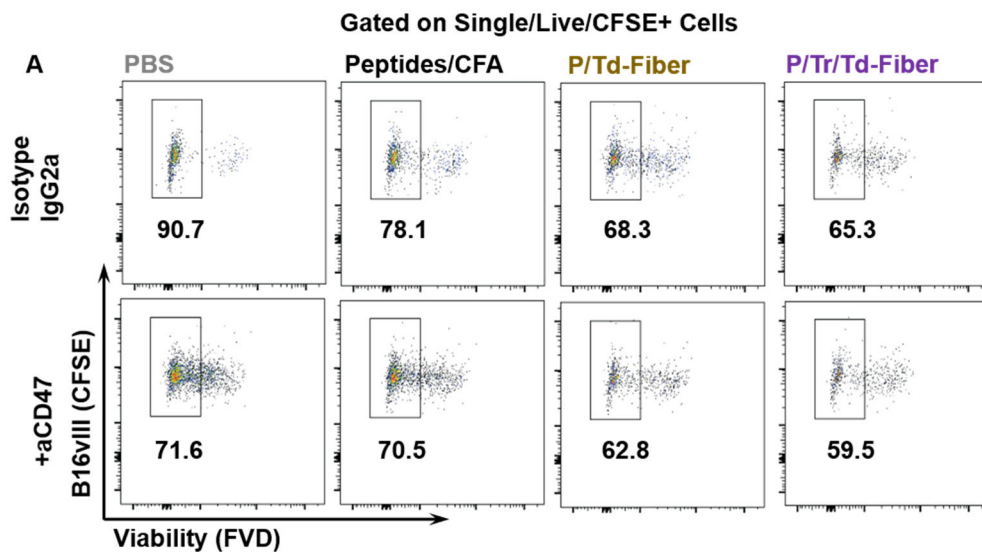

Figure S8. Representative flow cytometry of CFSE-labeled B16vIII cells 7 h after coculturing with NK cells in the presences of sera from four immunization groups (PBS, Peptides/CFA, P/Td-fiber and P/Tr/Td-fiber)

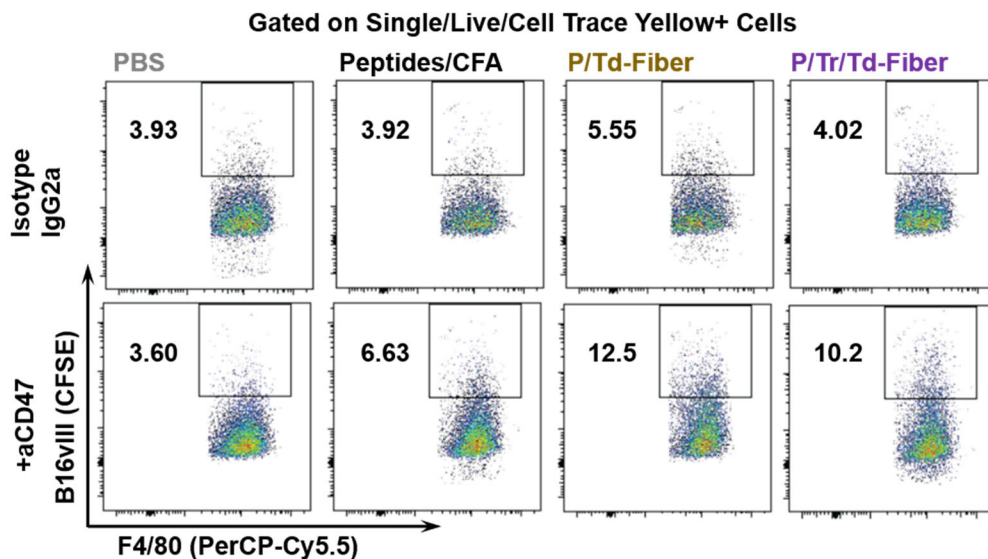

Figure S9. Representative flow cytometry of phagocytosis activity 5 h after coculturing B16vIII and BMDMs in the presences of sera from four immunization groups (PBS, Peptides/CFA, P/Td-fiber and P/Tr/Td-fiber)

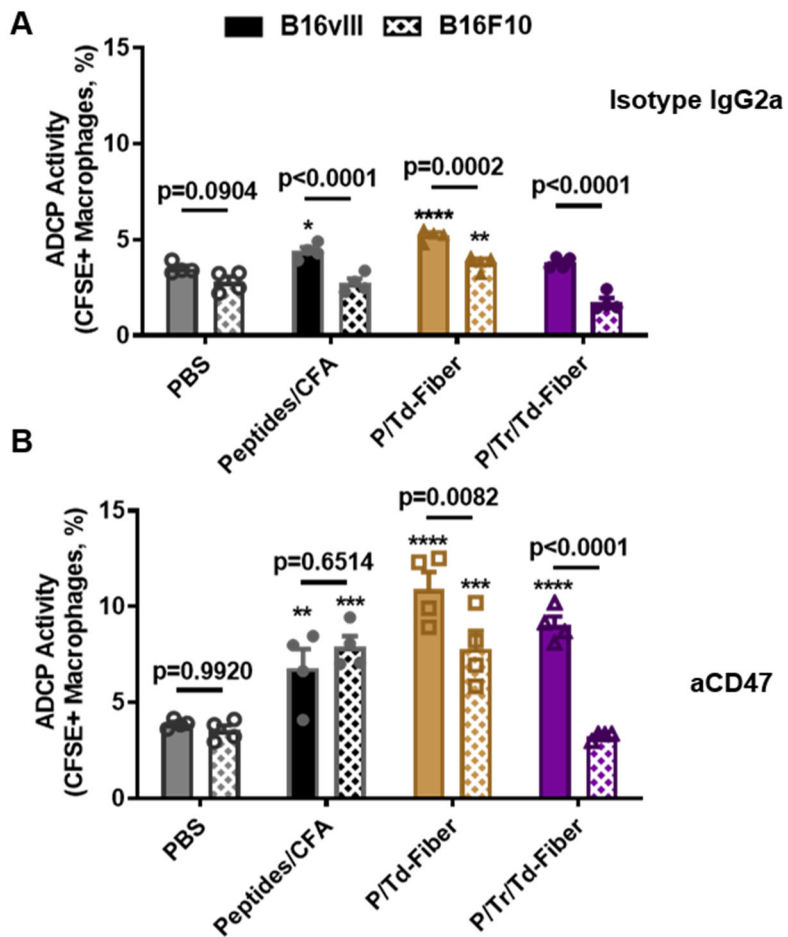

**Figure S10. Sera from immunized mice mediated ADPC phagocytosis specifically against cells with EGFRvIII receptors; and aCD47 antibodies enhanced ADPC against target cells.** CFSE-labelled B16vIII cells were incubated with CellTrace yellow-labelled BMDM with an E:T ratio of 2:1 in the presence of mouse sera from indicated groups, in addition to isotype control antibodies (**A**) or aCD47 (**B**). The phagocytosis activity against tumor cells (the percentage of CFSE+ macrophages) were assessed after a 5 hour incubation. The p-values were calculated between target cell types within each sera group, by multiple comparison using two-way ANOVA with Bonferroni test. \*  $p < 0.05$ , \*\*  $p < 0.01$ , \*\*\*  $p < 0.001$ , \*\*\*\*  $p < 0.0001$  compared with PBS within B16vIII or B16F10 groups, by multiple comparison using two-way ANOVA with Dunnett test (N=4).



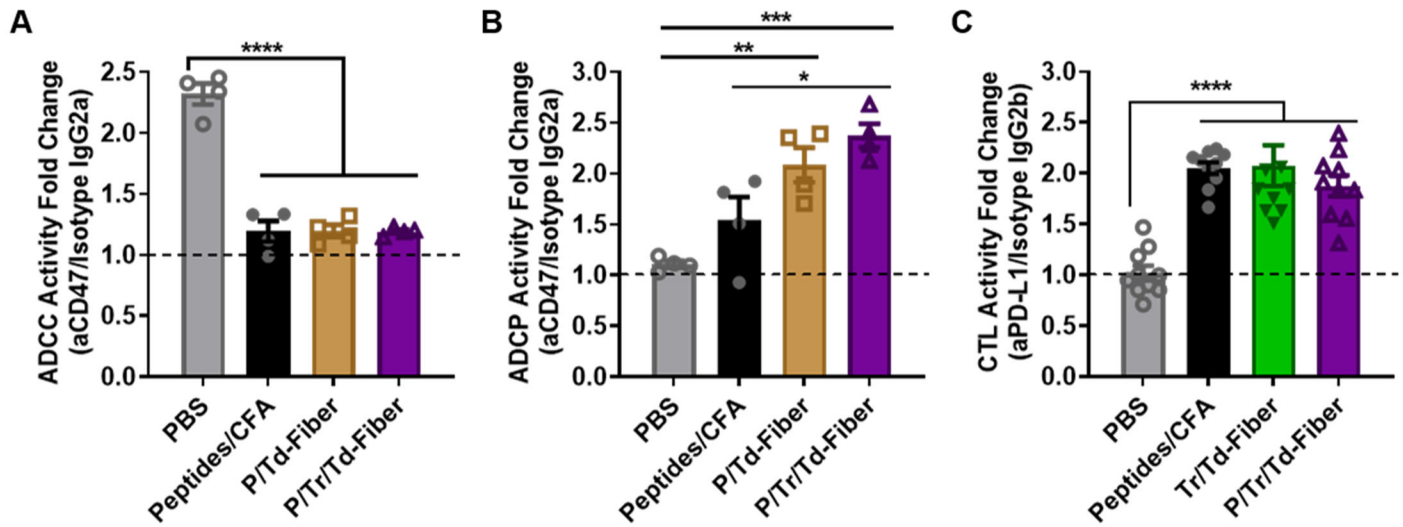

**Figure S11. Immune checkpoint and phagocytosis blockade antibodies enhanced cytotoxic activity against B16vIII cells *in vitro*.** Activity fold changes of the blockade antibodies relative to isotype control (experimental data from Figure 6A, 6B, and 6C): **(A)** ADCC (N=4) **(B)** ADCP (N=4) **(C)** CTL (N=10). \*  $p < 0.05$ , \*\*  $p < 0.01$ , \*\*\*  $p < 0.001$ , \*\*\*\*  $p < 0.0001$  by multiple comparison using one-way ANOVA with Tukey test).

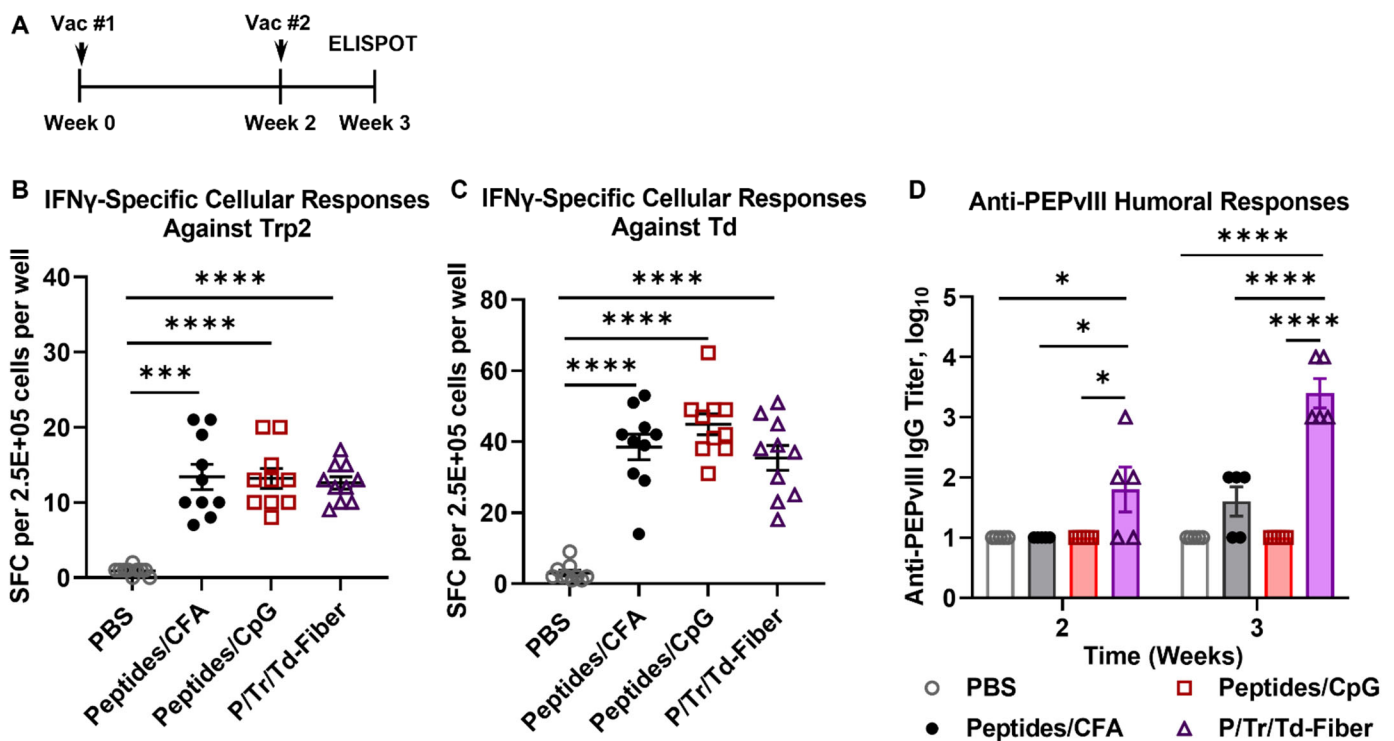

**Figure S12. P/Tr/Td-Fiber vaccine, CFA and CpG showed similar effect in eliciting T cell responses, while multi-epitope nanofibers exhibited superior ability in eliciting antibody responses against PEPvIII antigens.** **(A)** C57BL/6 mice received two subcutaneous immunizations (black arrows) and splenocytes were harvested on week 3 for ELISPOT assays. PEPvIII-specific IgG titers in sera were monitored on week 2 before booster immunizations and week 3. **(B)** P/Tr/Td-fiber, peptides/CFA emulsion group, and peptides/CpG group all stimulated significant level of Trp2-specific T cell responses on week 3 (\*\*  $p < 0.01$ , \*\*\*  $p < 0.001$ , \*\*\*\*  $p < 0.0001$  by multiple comparison using one-way ANOVA with Tukey test, N=10). **(C)** P/Tr/Td-fiber, peptides/CFA emulsion group, and peptides/CpG group all stimulated significant level of Td-specific T cell responses on week 3 (\*\*\*\*  $p < 0.0001$  by multiple comparison using one-way ANOVA with Tukey test, N=10). **(D)** P/Tr/Td-fiber elicited stronger PEPvIII-specific IgG responses after primary and booster immunizations, while neither CFA nor CpG was effective in inducing antibody responses when delivered with peptide epitopes. (\*  $p < 0.05$ , \*\*\*\*  $p < 0.0001$  by multiple comparison via one-way ANOVA with Tukey test, N=5).
